# Supplementary material for: Cyclin B3 Deficiency Impairs Germline Stem Cell Maintenance and Its Overexpression Delays Cystoblast Differentiation in Drosophila Ovary
Source: Int J Mol Sci. 2018 Jan 19;19(1):298. doi: 10.3390/ijms19010298 (PMC5796243; doi:10.3390/ijms19010298)
Supplement: Supplementary file 1 [file ijms-19-00298-s001.pdf]

**Table S1.** The rescue assay of *cycB3* mutants by the transgenic line of P{attB-*cycB3*-gDNA}

| Genotype                                                                                | Age <sup>1</sup> | Germaria |                       |       |          | Total |
|-----------------------------------------------------------------------------------------|------------------|----------|-----------------------|-------|----------|-------|
|                                                                                         |                  | Empty    | 0 GSC<br>(cysts only) | 1 GSC | 2-3 GSCs |       |
| <i>cycB3</i> <sup>2</sup> / <i>cycB3</i> <sup>2</sup>                                   | day1             | 3.0%     | 2.0%                  | 5.6%  | 89.4%    | 198   |
|                                                                                         | day14            | 41.8%    | 11.6%                 | 23.3% | 23.3%    | 146   |
| <i>attB-cycB3</i> -gDNA;<br><i>cycB3</i> <sup>2</sup> / <i>cycB3</i> <sup>2</sup>       | day1             | 2.1%     | 0                     | 1.6%  | 96.3%    | 190   |
|                                                                                         | day14            | 0        | 0.9%                  | 0.9%  | 98.2%    | 108*  |
| <i>cycB3</i> <sup>2</sup> / <i>cycB3</i> <sup>EY08012</sup>                             | day1             | 2.5%     | 1.7%                  | 2.5%  | 93.3%    | 120   |
|                                                                                         | day14            | 24.0%    | 5.3%                  | 24.0% | 46.7%    | 167   |
| <i>attB-cycB3</i> -gDNA;<br><i>cycB3</i> <sup>2</sup> / <i>cycB3</i> <sup>EY08012</sup> | day1             | 0        | 2.5%                  | 1.0%  | 96.4%    | 196   |
|                                                                                         | day14            | 0        | 0                     | 2.6%  | 97.4%    | 193*  |

<sup>1</sup>the days after eclosion. \**P*<0.001 ( $\chi^2$  test) when the total percentages of abnormal germaria (containing 1 GSC, 0 GSC and empty) from different *cycB3*-rescuing ovaries were compared with their corresponding mutants. 14-day-old flies were selectively analyzed.

**Table S2.** *cycB3* is intrinsically required for GSC maintenance in *Drosophila* ovary

| Genotype                                                                                              | Age <sup>1</sup> | Germaria |                       |       |          | Total |
|-------------------------------------------------------------------------------------------------------|------------------|----------|-----------------------|-------|----------|-------|
|                                                                                                       |                  | Empty    | 0 GSC<br>(cysts only) | 1 GSC | 2-3 GSCs |       |
| <i>cycB3</i> <sup>2</sup> / <i>cycB3</i> <sup>2</sup>                                                 | day1             | 2.4%     | 2.4%                  | 7.0%  | 88.2%    | 212   |
|                                                                                                       | day14            | 40.3%    | 12.9%                 | 23.7% | 23.1%    | 186   |
| <i>UASp-cycB3</i> ; <i>nosP-gvp</i> ,<br><i>cycB3</i> <sup>2</sup> / <i>cycB3</i> <sup>2</sup>        | day1             | 1.0%     | 0                     | 3.3%  | 95.7%    | 210   |
|                                                                                                       | day14            | 0        | 0.7%                  | 3.0%  | 96.3%    | 134*  |
| <i>nosP-cycB3</i> ;<br><i>cycB3</i> <sup>2</sup> / <i>cycB3</i> <sup>2</sup>                          | day1             | 0        | 0                     | 2.2%  | 97.8%    | 312   |
|                                                                                                       | day14            | 1.2%     | 0.5%                  | 1.2%  | 97.1%    | 347*  |
| <i>cycB3</i> <sup>2</sup> / <i>cycB3</i> <sup>EY08012</sup>                                           | day1             | 2.0%     | 0.5%                  | 5.0%  | 92.5%    | 200   |
|                                                                                                       | day14            | 34.7%    | 13.5%                 | 26.5% | 25.2%    | 230   |
| <i>UASp-cycB3</i> / <i>nosP-gvp</i> ;<br><i>cycB3</i> <sup>2</sup> / <i>cycB3</i> <sup>EY08012</sup>  | day1             | 0        | 0.4%                  | 2.1%  | 97.5%    | 237   |
|                                                                                                       | day14            | 0        | 0                     | 4.0%  | 96.0%    | 125*  |
| <i>nosP-cycB3</i> ;<br><i>cycB3</i> <sup>2</sup> / <i>cycB3</i> <sup>EY08012</sup>                    | day1             | 0        | 0                     | 2.7%  | 97.3%    | 339   |
|                                                                                                       | day14            | 0        | 0                     | 1.9%  | 98.1%    | 159*  |
| <i>c587-gal4</i> ; <i>UASp-cycB3</i> ;<br><i>cycB3</i> <sup>2</sup> / <i>cycB3</i> <sup>2</sup>       | day1             | 4.5%     | 0.8%                  | 9.1%  | 85.6%    | 132   |
|                                                                                                       | day14            | 32.9%    | 5.1%                  | 32.9% | 29.1%    | 237*  |
| <i>c587-gal4</i> ; <i>UASp-cycB3</i> ;<br><i>cycB3</i> <sup>2</sup> / <i>cycB3</i> <sup>EY08012</sup> | day1             | 2.3%     | 0                     | 8.7%  | 89.0%    | 219   |
|                                                                                                       | day14            | 44.8%    | 10.5%                 | 17.5% | 27.2%    | 257*  |

<sup>1</sup>the days after eclosion. \**P*<0.001 ( $\chi^2$  test) when the total percentages of abnormal germaria (containing 1 GSC, 0

GSC and empty) from different *cycB3*-rescuing ovaries were compared with their corresponding mutants.  $^*P>0.05$  ( $\chi^2$  test) when the total percentages of abnormal germaria from *cycB3*-rescuing ovaries were compared with their corresponding mutants. 14-day-old flies were selectively analyzed.

**Table S3.** The analysis of the cell death in *cycB3* mutant ovaries.

| Genotype                                   | The percentages of apoptotic GSCs between wild type and <i>cycB3</i> mutant fly ovaries |
|--------------------------------------------|-----------------------------------------------------------------------------------------|
| <i>Oregon-R</i>                            | 1.4% (N=210)                                                                            |
| <i>cycB3<sup>2</sup>/cycB3<sup>2</sup></i> | 1.8% (N=223)                                                                            |
| <i>FRT control</i>                         | 1.5% (N=201)                                                                            |
| <i>FRT cycB3<sup>2</sup></i>               | 1.0% (N=197)                                                                            |

N, the total number of GSCs examined.

**Table S4.** Primers used for generating *cycB3* transgenic vectors.

| No. | Primer Sequences                                                       | Restriction enzymes<br>(underlined) |
|-----|------------------------------------------------------------------------|-------------------------------------|
| P1  | 5'-AAAC <u>CCTGCAGG</u> CCAATGTTGCCCTAAGAAATTCATAATGGG-<br>3'(forward) | <i>SbfI</i>                         |
| P2  | 5'-TTT <u>GGTACCT</u> TAAACCTTTGACATCTAGGAGTTTATGCTC-<br>3'(reverse)   | <i>KpnI</i>                         |
| P3  | 5'-TTT <u>GGCGCGCC</u> ATGGCGCCCACAAAAGCAACAAC -3' (forward)           | <i>AscI</i>                         |
| P4  | 5'-TTT <u>GGTACCT</u> ACGACAGATTGCTTTTCGTTTC-3' (reverse)              | <i>KpnI</i>                         |
| P5  | 5'-TTT <u>GGCGCGCC</u> CGACAGATTGCTTTTCGTTTCAGGTCAAG-<br>3'(reverse)   | <i>AscI</i>                         |
| P6  | 5'- AAAGGT <u>ACCGCCG</u> CTGTGGGCAAAGGA-3'(forward)                   | <i>KpnI</i>                         |
| P7  | 5'- TTT <u>GGTACCT</u> TACTTGTACAGCTCGTCCATGCCG-3'(reverse)            | <i>KpnI</i>                         |
